# Supplementary material
Source: PubMed Central journal article supplement (PMC3157253)
Supplement: mmc1.pdf [file mmc1.pdf]

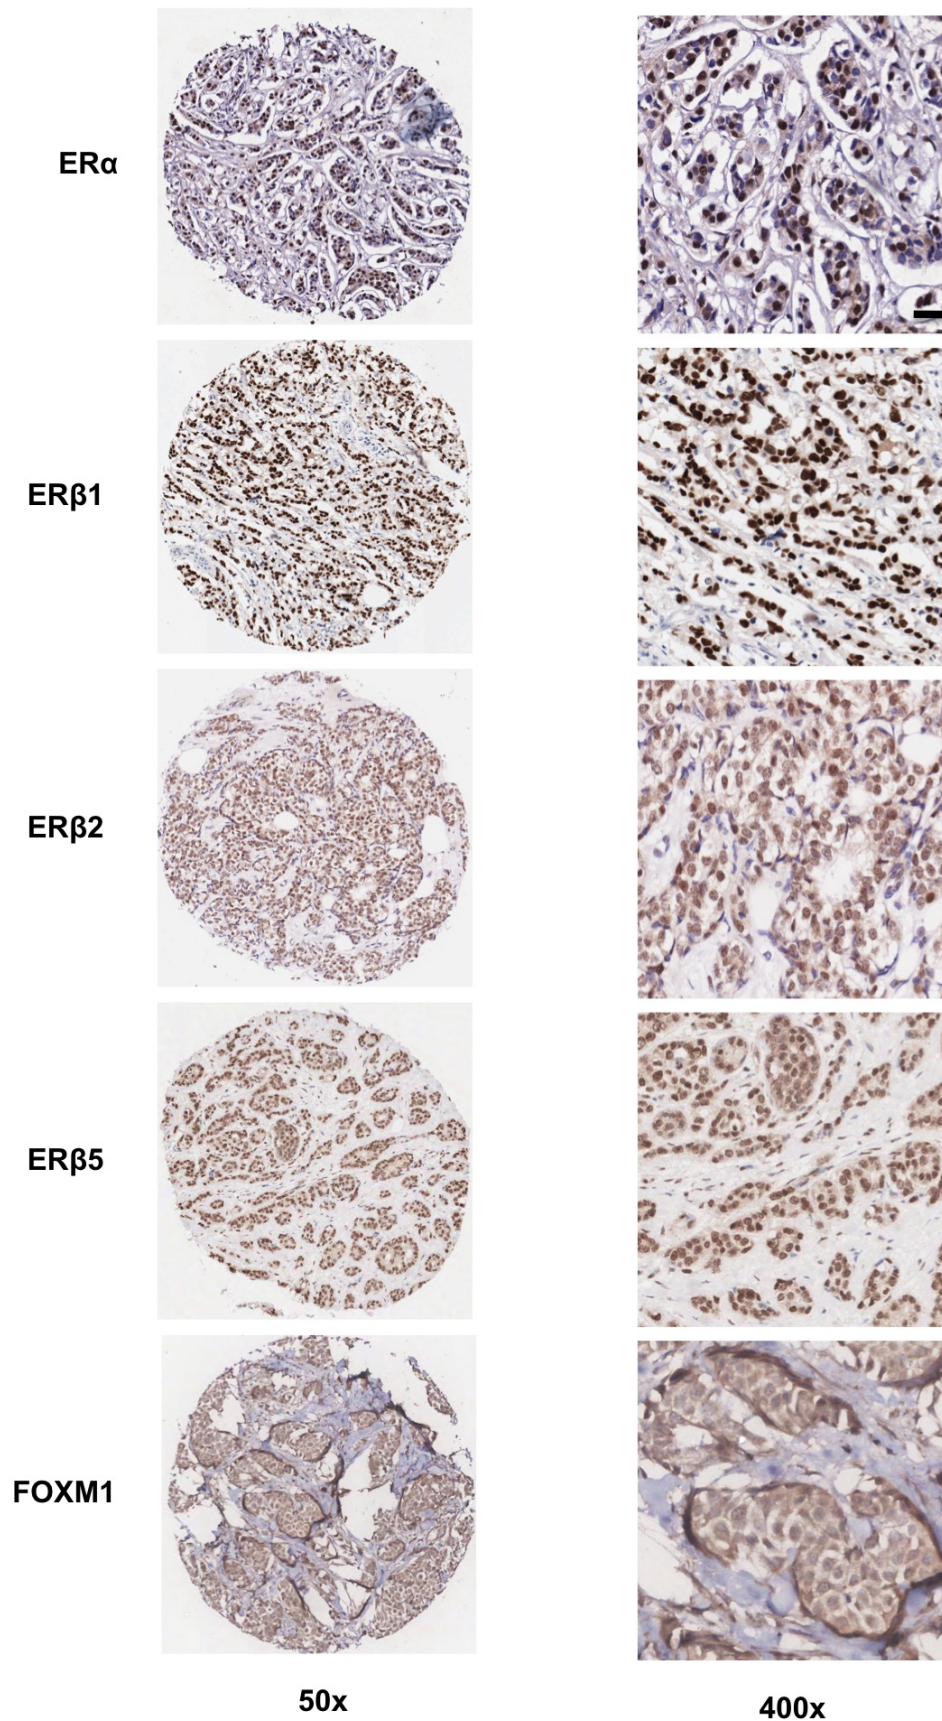

**Supplementary Figure S1. Representative staining of TMAs with antibodies against ER $\alpha$ , ER $\beta$ 1, ER $\beta$ 2, ER $\beta$ 5 and FOXM1. Scale bar represents 30 $\mu$ m.**
