# Supplementary material
Source: PubMed Central journal article supplement (PMC3157253)
Supplement: mmc2.pdf [file mmc2.pdf]

**A****Total (n=245)**

| ERβ1 | FOXM1 |    |
|------|-------|----|
|      | +     | -  |
| +    | 168   | 68 |
| -    | 9     | 0  |

Fisher p=0.051

| ERβ2 | FOXM1 |    |
|------|-------|----|
|      | +     | -  |
| +    | 134   | 54 |
| -    | 40    | 12 |

Fisher p=0.420

| ERβ5 | FOXM1 |    |
|------|-------|----|
|      | +     | -  |
| +    | 151   | 57 |
| -    | 1     | 3  |

Fisher p=0.070

**B****ERα+ (n=173)**

| ERβ1 | FOXM1 |    |
|------|-------|----|
|      | +     | -  |
| +    | 108   | 56 |
| -    | 8     | 0  |

Fisher p=0.039

| ERβ2 | FOXM1 |    |
|------|-------|----|
|      | +     | -  |
| +    | 96    | 48 |
| -    | 22    | 7  |

Fisher p=0.332

| ERβ5 | FOXM1 |    |
|------|-------|----|
|      | +     | -  |
| +    | 100   | 51 |
| -    | 0     | 1  |

Fisher p=0.342

**Supplementary Figure S2. Statistical analysis of FOXM1, ERβ1, ERβ2 and ERβ5 staining by Fisher's test.**

The staining of FOXM1, ERβ1, ERβ2 and ERβ5 was assessed with a scanscope (Scanscope Aperio Technologies, Inc, Vista, Calif) connected to a personal computer. The staining intensity and percentage of staining in the cytoplasm and the nucleus were each scored independently in a semi-quantitative fashion. For each case, a final score from the nucleus and the cytoplasm was obtained by multiplying the score of intensity with the score of percentage, 8 being the maximum final score. To avoid subjectivity in evaluation, scoring was done by two independent individuals. Scores of 0-3 are classified as negative (-) and 4-8 as positive (+). **(A)** There was no significant correlation between the expression levels of FOXM1 and ERβ2 or ERβ5. A potential but non-significant inverse correlation trend was detected between ERβ1 and FOXM1 expression (n=245, p=0.051). **(B)** When immunohistochemical data was re-evaluated after excluding ERα-negative samples, a significant correlation was observed between FOXM1 and ERβ1 expression (n=173; p=0.039) but not between FOXM1 and ERβ2 or ERβ5.
