# Supplementary material
Source: PubMed Central journal article supplement (PMC3157253)
Supplement: mmc3.pdf [file mmc3.pdf]

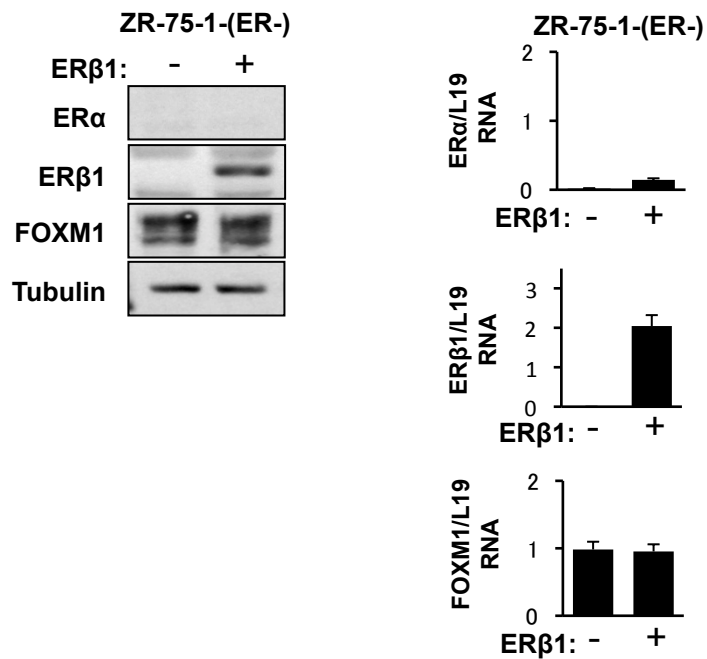

**Supplementary Figure S3. ERβ1 has no effects on FOXM1 expression in the ERα-negative ZR75-1(ER-) cells**  
 Effects of ERβ1 ectopic expression on FOXM1 expression was examined in the ERα-negative ZR75-1(ER-) breast carcinoma cell line. The breast cancer cells were transiently transfected with ERβ1 expression vector or an empty vector control and were collected at 48 h for Western blot analysis for ERα, ERβ, FOXM1 and Tubulin expression (left panel) and for and qRT-PCR analysis (right panels).
