# Supplementary material
Source: PubMed Central journal article supplement (PMC3157253)
Supplement: mmc4.pdf [file mmc4.pdf]

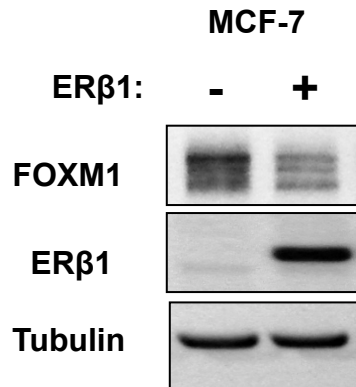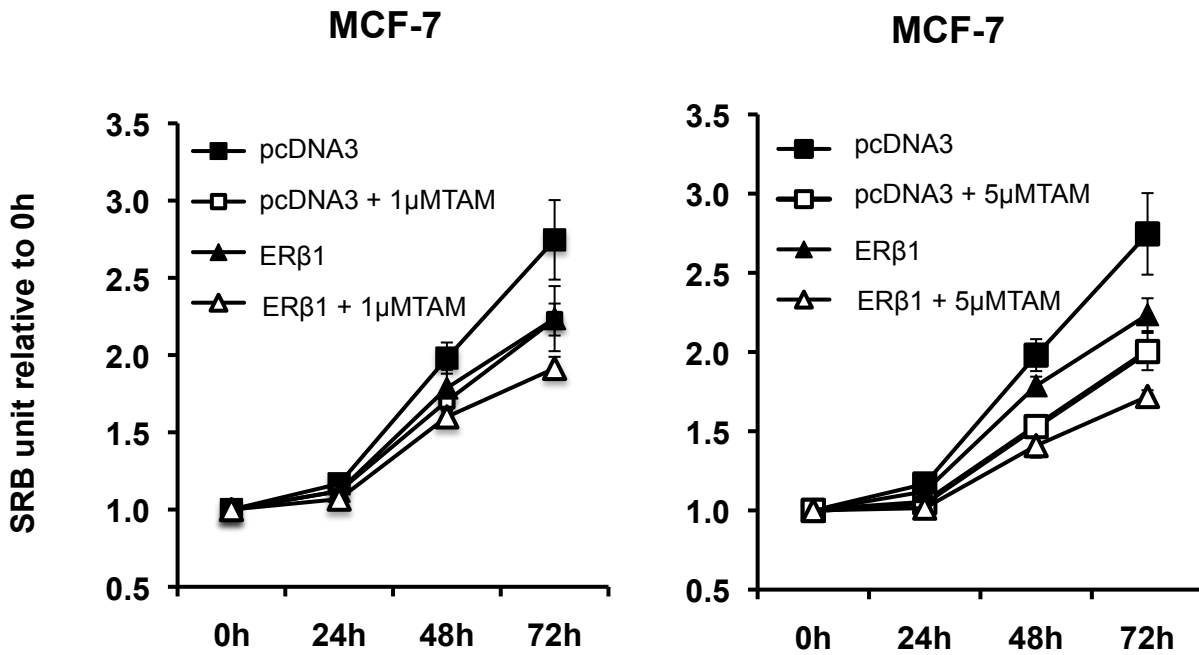

**Supplementary Figure S4. ERβ1 can combine with tamoxifen to inhibit the proliferation of the ERα-positive MCF-7 breast cancer cells. has no effects on FOXM1 expression in the ERα-negative ZR75-1(ER-) cells**  
MCF-7 breast cancer cells transfected with ERβ1 expression vector or an empty vector control pcDNA3 were cultured with 0, 1, or 5 μM Tamoxifen in the presence of E2. Aliquots of the transfected cells were collected for Western blot analysis ERβ, FOXM1 and Tubulin expression (top panel) and used for SRB proliferation analysis (lower panels).
